# Supplementary material
Source: publisher figshare collection journal article supplement (https://acs.figshare.com/ndownloader/files/4080775)
Supplement: Supplementary file 1 [file 4080775]

HEADER    UNKNOWN
TITLE      
AUTHOR    GENERATED BY XX2PDB (Keith Refson, 1998)
CRYST1    5.446   41.627    5.042  90.61  92.30  91.08 P 1
SCALE1      0.183618  0.003458  0.007415        0.00000
SCALE2      0.000000  0.024027  0.000274        0.00000
SCALE3      0.000000  0.000000  0.198507        0.00000
HETATM    1  H01 NON A   1       1.799   5.684   3.969  1.00  0.00           H
HETATM    2  H02 NON A   1       2.310   7.462   2.064  1.00  0.00           H
HETATM    3  H03 NON A   1       2.678   8.568   0.766  1.00  0.00           H
HETATM    4  H04 NON A   1       4.729   7.153   2.558  1.00  0.00           H
HETATM    5  H05 NON A   1       5.165   8.130   1.164  1.00  0.00           H
HETATM    6  H06 NON A   1       3.596   9.093   3.617  1.00  0.00           H
HETATM    7  H07 NON A   1       3.914  10.082   2.206  1.00  0.00           H
HETATM    8  H08 NON A   1       0.634   8.867   3.992  1.00  0.00           H
HETATM    9  H09 NON A   1       0.923   9.881   2.587  1.00  0.00           H
HETATM   10  H10 NON A   1       5.040  10.801   0.058  1.00  0.00           H
HETATM   11  H11 NON A   1       5.072  11.748   3.677  1.00  0.00           H
HETATM   12  H12 NON A   1       2.084  10.683   0.376  1.00  0.00           H
HETATM   13  H13 NON A   1       2.106  11.637   3.998  1.00  0.00           H
HETATM   14  H14 NON A   1       0.793  12.516   1.493  1.00  0.00           H
HETATM   15  H15 NON A   1       1.009  13.532   0.079  1.00  0.00           H
HETATM   16  H16 NON A   1       3.284  12.415   1.796  1.00  0.00           H
HETATM   17  H17 NON A   1       3.497  13.436   0.385  1.00  0.00           H
HETATM   18  H18 NON A   1       1.994  14.247   2.928  1.00  0.00           H
HETATM   19  H19 NON A   1       2.210  15.269   1.518  1.00  0.00           H
HETATM   20  H20 NON A   1       4.478  14.138   3.237  1.00  0.00           H
HETATM   21  H21 NON A   1       4.703  15.146   1.817  1.00  0.00           H
HETATM   22  H22 NON A   1       3.190  15.987   4.344  1.00  0.00           H
HETATM   23  H23 NON A   1       3.417  16.995   2.923  1.00  0.00           H
HETATM   24  H24 NON A   1       0.231  15.862   4.652  1.00  0.00           H
HETATM   25  H25 NON A   1       0.459  16.863   3.228  1.00  0.00           H
HETATM   26  H26 NON A   1       4.619  17.775   0.724  1.00  0.00           H
HETATM   27  H27 NON A   1       4.624  18.716   4.332  1.00  0.00           H
HETATM   28  H28 NON A   1       1.654  17.634   0.990  1.00  0.00           H
HETATM   29  H29 NON A   1       1.671  18.577   4.605  1.00  0.00           H
HETATM   30  H30 NON A   1       0.399  19.565   2.102  1.00  0.00           H
HETATM   31  H31 NON A   1       0.796  20.567   0.694  1.00  0.00           H
HETATM   32  H32 NON A   1       2.091  19.926   1.717  1.00  0.00           H
HETATM   33  H33 NON A   1       3.366   3.543   3.812  1.00  0.00           H
HETATM   34  H34 NON A   1       1.841   1.519   0.347  1.00  0.00           H
HETATM   35  H35 NON A   1       0.140   3.347   0.160  1.00  0.00           H
HETATM   36  H36 NON A   1       0.129   5.132   1.802  1.00  0.00           H
HETATM   37  H37 NON A   1       3.979   0.960   0.317  1.00  0.00           H
HETATM   38  H38 NON A   1       4.167  41.584   1.396  1.00  0.00           H
HETATM   39  H00 NON A   1       2.661  35.878   1.068  1.00  0.00           H
HETATM   40  H00 NON A   1       2.150  34.100   2.973  1.00  0.00           H
HETATM   41  H00 NON A   1       1.782  32.994   4.271  1.00  0.00           H
HETATM   42  H00 NON A   1      -0.269  34.409   2.480  1.00  0.00           H
HETATM   43  H00 NON A   1      -0.705  33.432   3.873  1.00  0.00           H
HETATM   44  H00 NON A   1       0.864  32.469   1.421  1.00  0.00           H
HETATM   45  H00 NON A   1       0.546  31.480   2.831  1.00  0.00           H
HETATM   46  H00 NON A   1       3.826  32.695   1.046  1.00  0.00           H
HETATM   47  H00 NON A   1       3.537  31.681   2.450  1.00  0.00           H
HETATM   48  H00 NON A   1      -0.580  30.761   4.979  1.00  0.00           H
HETATM   49  H00 NON A   1      -0.612  29.814   1.361  1.00  0.00           H
HETATM   50  H00 NON A   1       2.376  30.879   4.662  1.00  0.00           H
HETATM   51  H00 NON A   1       2.353  29.925   1.039  1.00  0.00           H
HETATM   52  H00 NON A   1       3.666  29.046   3.545  1.00  0.00           H
HETATM   53  H00 NON A   1       3.451  28.030   4.959  1.00  0.00           H
HETATM   54  H00 NON A   1       1.176  29.147   3.242  1.00  0.00           H
HETATM   55  H00 NON A   1       0.963  28.127   4.653  1.00  0.00           H
HETATM   56  H00 NON A   1       2.466  27.316   2.109  1.00  0.00           H
HETATM   57  H00 NON A   1       2.250  26.294   3.520  1.00  0.00           H
HETATM   58  H00 NON A   1      -0.019  27.424   1.801  1.00  0.00           H
HETATM   59  H00 NON A   1      -0.243  26.416   3.221  1.00  0.00           H
HETATM   60  H00 NON A   1       1.270  25.575   0.694  1.00  0.00           H
HETATM   61  H00 NON A   1       1.043  24.567   2.114  1.00  0.00           H
HETATM   62  H00 NON A   1       4.229  25.700   0.386  1.00  0.00           H
HETATM   63  H00 NON A   1       4.001  24.700   1.809  1.00  0.00           H
HETATM   64  H00 NON A   1      -0.159  23.787   4.313  1.00  0.00           H
HETATM   65  H00 NON A   1      -0.164  22.846   0.706  1.00  0.00           H
HETATM   66  H00 NON A   1       2.805  23.928   4.048  1.00  0.00           H
HETATM   67  H00 NON A   1       2.789  22.985   0.432  1.00  0.00           H
HETATM   68  H00 NON A   1       4.061  21.997   2.936  1.00  0.00           H
HETATM   69  H00 NON A   1       3.663  20.995   4.343  1.00  0.00           H
HETATM   70  H00 NON A   1       2.369  21.636   3.320  1.00  0.00           H
HETATM   71  H00 NON A   1       1.094  38.019   1.225  1.00  0.00           H
HETATM   72  H00 NON A   1       2.619  40.043   4.691  1.00  0.00           H
HETATM   73  H00 NON A   1       4.320  38.215   4.877  1.00  0.00           H
HETATM   74  H00 NON A   1       4.331  36.431   3.236  1.00  0.00           H
HETATM   75  H00 NON A   1       0.481  40.602   4.720  1.00  0.00           H
HETATM   76  H00 NON A   1       0.293  -0.022   3.642  1.00  0.00           H
HETATM   77  C00 NON A   1       3.061   6.539   0.343  1.00  0.00           C
HETATM   78  C00 NON A   1       3.070   7.686   1.296  1.00  0.00           C
HETATM   79  C00 NON A   1       4.396   8.005   1.945  1.00  0.00           C
HETATM   80  C00 NON A   1       4.330   9.252   2.807  1.00  0.00           C
HETATM   81  C00 NON A   1       0.202   9.693   3.402  1.00  0.00           C
HETATM   82  C00 NON A   1       0.093  10.938   4.266  1.00  0.00           C
HETATM   83  C00 NON A   1       1.407  11.432   4.828  1.00  0.00           C
HETATM   84  C00 NON A   1       1.488  12.724   0.660  1.00  0.00           C
HETATM   85  C00 NON A   1       2.804  13.225   1.219  1.00  0.00           C
HETATM   86  C00 NON A   1       2.687  14.456   2.094  1.00  0.00           C
HETATM   87  C00 NON A   1       4.006  14.947   2.650  1.00  0.00           C
HETATM   88  C00 NON A   1       3.886  16.185   3.510  1.00  0.00           C
HETATM   89  C00 NON A   1      -0.237  16.672   4.064  1.00  0.00           C
HETATM   90  C00 NON A   1      -0.345  17.908   4.916  1.00  0.00           C
HETATM   91  C00 NON A   1       1.188  18.452   0.413  1.00  0.00           C
HETATM   92  C00 NON A   1       1.115  19.688   1.275  1.00  0.00           C
HETATM   93  C00 NON A   1       2.660   3.442   2.986  1.00  0.00           C
HETATM   94  C00 NON A   1       2.733   2.398   2.105  1.00  0.00           C
HETATM   95  C00 NON A   1       1.822   2.339   1.064  1.00  0.00           C
HETATM   96  C00 NON A   1       0.879   3.346   0.959  1.00  0.00           C
HETATM   97  C00 NON A   1       0.871   4.334   1.881  1.00  0.00           C
HETATM   98  C00 NON A   1       3.767   1.319   2.338  1.00  0.00           C
HETATM   99  C00 NON A   1       1.398  35.023   4.695  1.00  0.00           C
HETATM  100  C00 NON A   1       1.390  33.876   3.741  1.00  0.00           C
HETATM  101  C00 NON A   1       0.064  33.557   3.093  1.00  0.00           C
HETATM  102  C00 NON A   1       0.130  32.310   2.230  1.00  0.00           C
HETATM  103  C00 NON A   1       4.258  31.869   1.635  1.00  0.00           C
HETATM  104  C00 NON A   1       4.367  30.624   0.772  1.00  0.00           C
HETATM  105  C00 NON A   1       3.053  30.130   0.210  1.00  0.00           C
HETATM  106  C00 NON A   1       2.972  28.838   4.378  1.00  0.00           C
HETATM  107  C00 NON A   1       1.656  28.337   3.819  1.00  0.00           C
HETATM  108  C00 NON A   1       1.773  27.107   2.943  1.00  0.00           C
HETATM  109  C00 NON A   1       0.453  26.616   2.387  1.00  0.00           C
HETATM  110  C00 NON A   1       0.574  25.377   1.527  1.00  0.00           C
HETATM  111  C00 NON A   1       4.697  24.890   0.973  1.00  0.00           C
HETATM  112  C00 NON A   1       4.805  23.654   0.122  1.00  0.00           C
HETATM  113  C00 NON A   1       3.272  23.111   4.625  1.00  0.00           C
HETATM  114  C00 NON A   1       3.345  21.874   3.763  1.00  0.00           C
HETATM  115  C00 NON A   1       1.800  38.120   2.051  1.00  0.00           C
HETATM  116  C00 NON A   1       1.727  39.164   2.933  1.00  0.00           C
HETATM  117  C00 NON A   1       2.638  39.223   3.973  1.00  0.00           C
HETATM  118  C00 NON A   1       3.581  38.216   4.079  1.00  0.00           C
HETATM  119  C00 NON A   1       3.589  37.228   3.157  1.00  0.00           C
HETATM  120  C00 NON A   1       0.693  40.243   2.699  1.00  0.00           C
HETATM  121  N01 NON A   1       1.757   4.431   2.874  1.00  0.00           N
HETATM  122  N02 NON A   1       4.177   0.647   1.279  1.00  0.00           N
HETATM  123  N03 NON A   1       2.703  37.131   2.163  1.00  0.00           N
HETATM  124  N04 NON A   1       0.283  40.915   3.759  1.00  0.00           N
HETATM  125  O00 NON A   1       3.873   5.643   0.327  1.00  0.00           O
HETATM  126  O00 NON A   1       1.805   6.506   4.600  1.00  0.00           O
HETATM  127  O00 NON A   1       4.224   1.132   3.467  1.00  0.00           O
HETATM  128  O00 NON A   1       0.587  35.919   4.711  1.00  0.00           O
HETATM  129  O00 NON A   1       2.655  35.056   0.438  1.00  0.00           O
HETATM  130  O00 NON A   1       0.235  40.430   1.570  1.00  0.00           O
TER     130      NON A   1
END
